# Supplementary material for: A low-cost cellulose-based composite as an efficient solid phase extraction sorbent for the determination of antibiotics in water
Source: Royal Society of Chemistry journal article supplement (doi:10.1039/d5ra02296g), 2025-01-01
Supplement: d5ra02296g1.pdf [file d5ra02296g1.pdf]

## Electronic Supplementary Information

### Low-cost cellulose-based composite as an efficient solid phase extraction sorbent for the determination of antibiotics in water

Damilare Olorunnisola<sup>1,2,3,4</sup>, Chidinma G. Olorunnisola<sup>1,3</sup>, Christina Günter<sup>5</sup>, Chukwunonso P. Okoli<sup>3,6</sup>, Martins O. Omorogie<sup>3,4</sup>, Emmanuel I. Unuabonah<sup>3,4</sup>, Harshadrai M. Rawel<sup>2\*</sup>, Andreas Taubert<sup>1\*</sup>

<sup>1</sup> *Institute of Chemistry, University of Potsdam, D-14476 Potsdam, Germany*

<sup>2</sup> *Institute of Nutritional Science, University of Potsdam, 14558 Nuthetal, Potsdam, Germany*

<sup>3</sup> *African Centre of Excellence for Water and Environment Research (ACEWATER), Redeemer's University, PMB 230, Ede, Osun State, Nigeria.*

<sup>4</sup> *Department of Chemical Sciences, Redeemer's University, PMB 230, Ede, Osun State, Nigeria.*

<sup>5</sup> *Institute of Geosciences, University of Potsdam, D-14476 Potsdam, Germany.*

<sup>6</sup> *Department of Chemistry, Alex Ekwueme Federal University Ndufu-Alike, Ebonyi State, Nigeria*

### Corresponding Author

Andreas Taubert [ataubert@uni-potsdam.de](mailto:ataubert@uni-potsdam.de)

Harshadrai M. Rawel [rawel@uni-potsdam.de](mailto:rawel@uni-potsdam.de)

**Table S1. LC-MS/MS operation conditions**

| MS/MS                      |                                    |
|----------------------------|------------------------------------|
| Ionization source          | ESI positive or negative           |
| Detection                  | Multiple reaction monitoring (MRM) |
| Fragment voltage           | 70 – 100 V; individually optimized |
| Collision energy (ev)      | 5 – 43 eV; individually optimized  |
| Dwell time                 | 50 ms                              |
| Sheath gas and temperature | Nitrogen, at 275 °C                |

**Table S2. MS/MS condition for the identification of targeted compounds**

| Compound         | Retention time (min) | ESI mode | Precursor ion (m/z) | Product ions (m/z) | Fragment voltage (V) | Collision energy (eV) |
|------------------|----------------------|----------|---------------------|--------------------|----------------------|-----------------------|
| Tetracycline     | 4.9                  | +        | 445.2               | 427.1/410.1/153.9  | 80                   | 10/20/28              |
| Sulfamethoxazole | 6.0                  | +        | 254.3               | 156/108            | 80                   | 15/27                 |
| Ampicillin       | 5.5                  | +        | 350.1               | 192/174/160        | 80                   | 16/16/25              |
| Penicillin V     | 7.9                  | +        | 351.4               | 192/160/114        | 80                   | 5/15/37               |
| Chloramphenicol  | 7.1                  | +        | 324.1               | 306/275.9/165.9    | 70                   | 6/15/35               |

### S1.0 Analytes' Calibration Curve

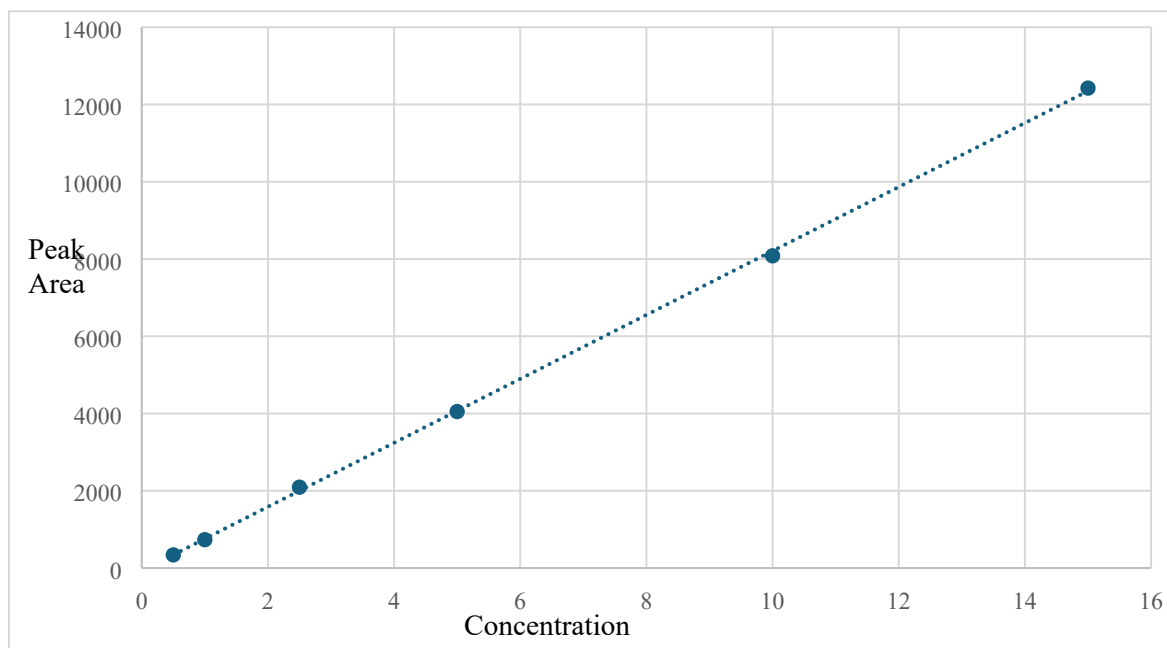

Fig S1a. Calibration curve to estimate Tetracycline (TET) recovery

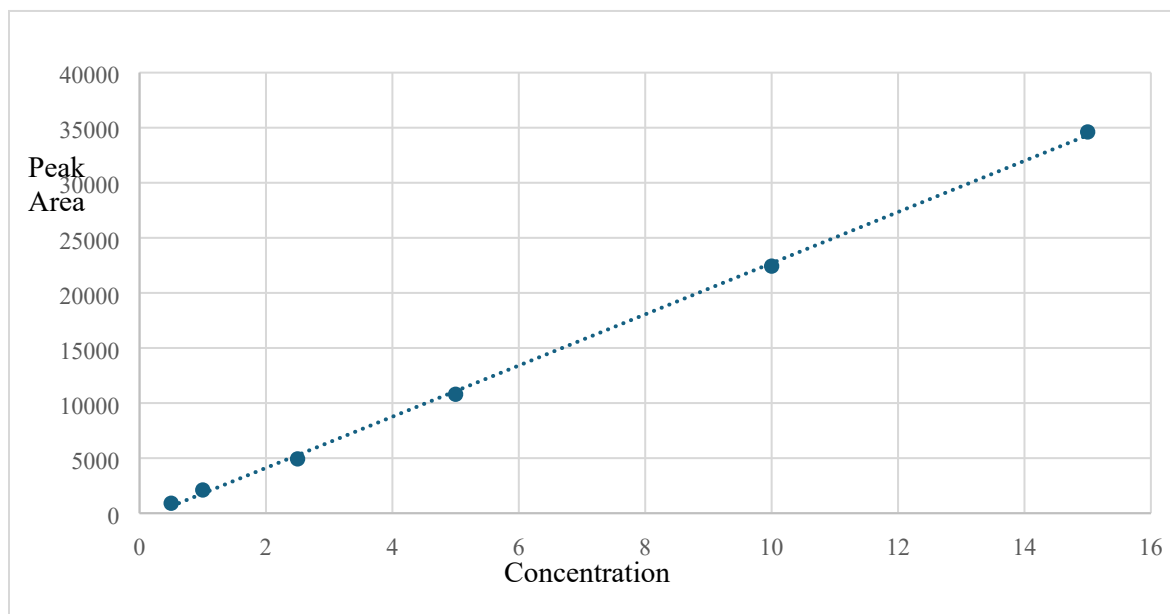

Fig S1b. Calibration curve to estimate Ampicillin (AMP) recovery

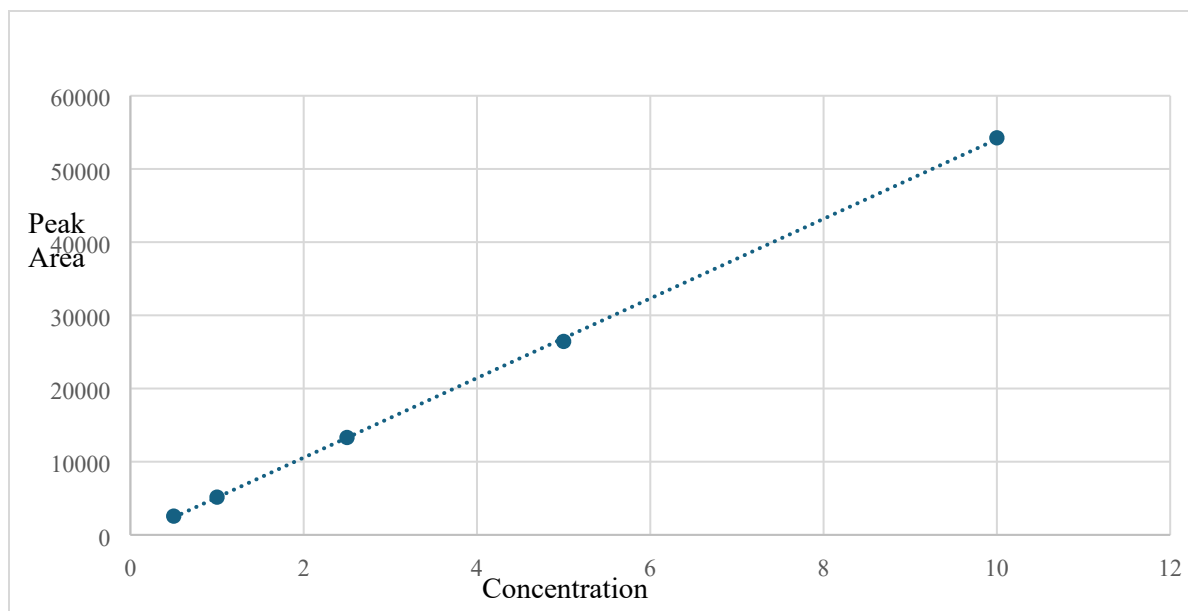

Fig S1c. Calibration curve to estimate Sulfamethoxazole (SMX) recovery

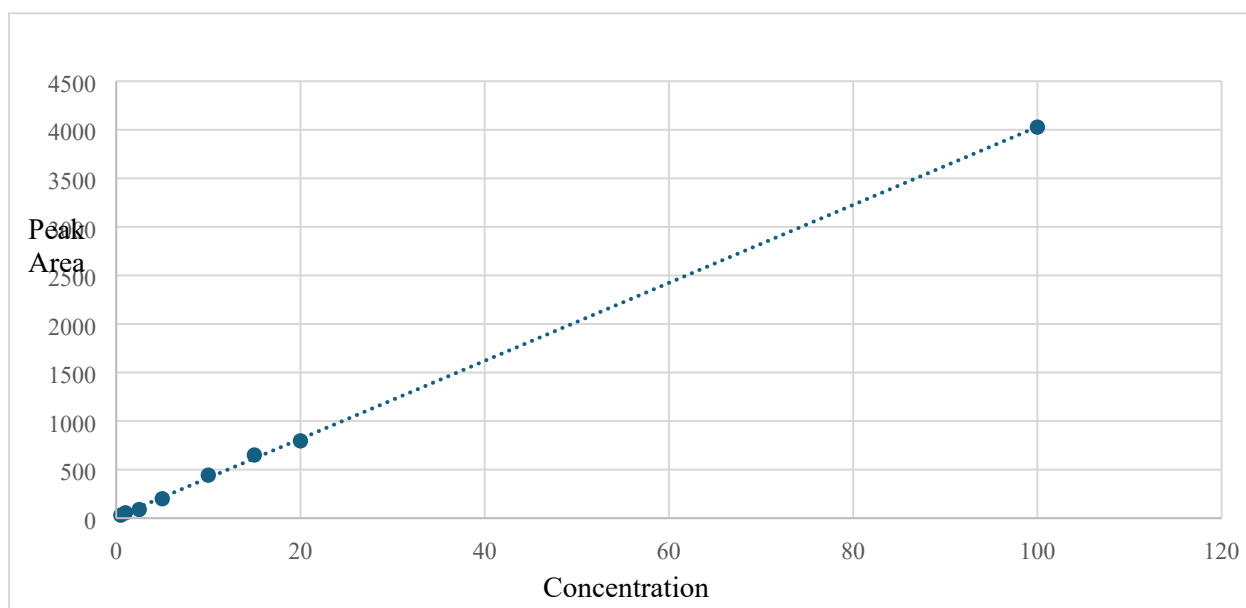

Fig S1d. Calibration curve to estimate Penicillin V (PEN V) recovery

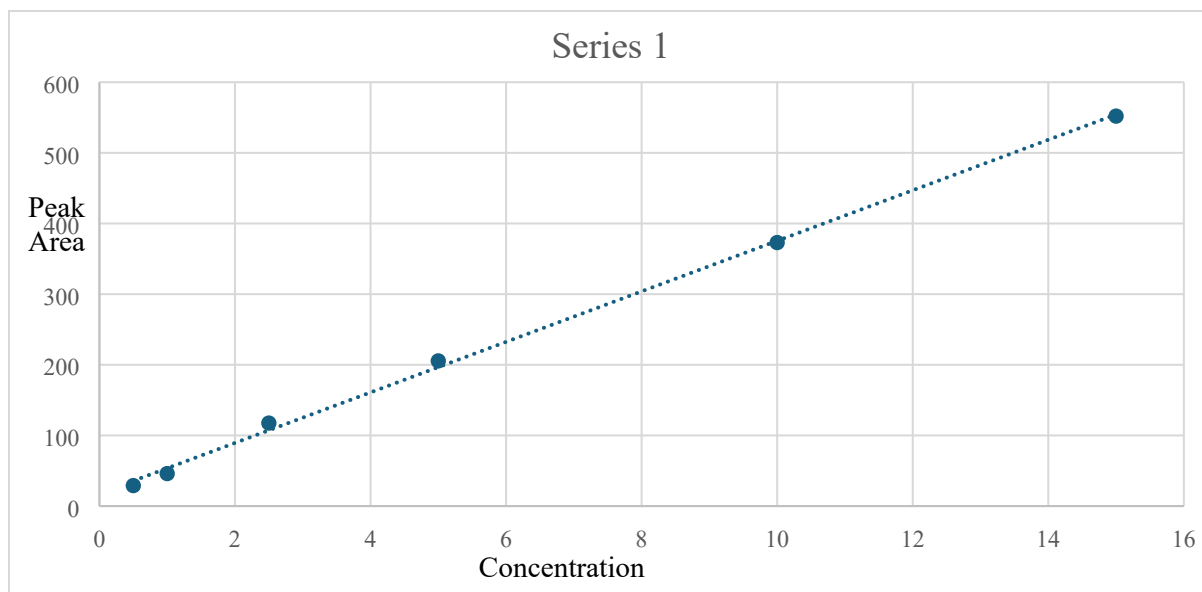

Fig S1e. Calibration curve to estimate Chloramphenicol (CAP) recovery

## S2.0 Evaluation of Method Performance and Validation

The performance of the developed pre-concentration method was assessed by evaluating linearity/linear range, recovery, precision, and detection limit. These parameters were evaluated according to guidelines for single-laboratory validation of analytical methods for trace-level concentrations of organic chemicals, (Dayananda et al., 2015; Fajgelj & Ambrus, 2000) while validation was based on parameters defined in standard protocols describing chromatographic methods (Kaza, Karaźniewicz-Łada, Kosicka, Siemiątkowska, & Rudzki, 2019). The extraction efficiency (%) for each analyte was determined as:

$$\%R = \frac{C_e \times V_e}{C_s \times V_s} \times 100 \quad (S1)$$

Here,  $C_e$  is the concentration of eluate (ng/L),  $V_e$  the volume of eluate (mL),  $C_s$  the concentration of sample (ng/L) and  $V_s$  the volume of sample (mL).

The performance evaluation and validation of the parameters were investigated by enriching real and spiked water samples at suitable spike levels under the optimized SPE conditions.

Limit of detection (LOD) was evaluated by the official method according to the international conference on harmonization of technical requirements for registration of pharmaceuticals for human use (Guideline, 2013). LOD was calculated based on the standard deviation of the response and the slope expressed as:

$$LOD = \frac{3.3 \sigma}{S} \quad (S2)$$

where  $\sigma$  is the standard deviation of the response and  $S$  is the slope of the linear range calibration curve. Six replicate analysis of tap water and river water samples were done with different spike level. Limit of Quantification (LOQ) is expressed as:

$$LOQ = \frac{10 \sigma}{S} \quad (S3)$$

Precision was measured with relative standard deviations (RSD) of the data obtained from the experiment for MDL. RSD was calculated using the following expression:

$$RSD = \frac{s}{\bar{x}} \times 100 \quad (S4)$$

where  $s$  is the standard deviation, and  $\bar{x}$  is the mean value of six replicate measurements.

Linearity/linear range was evaluated by subjecting water samples containing the analytes in the concentration range 0.25 – 25 ng/L to extraction, pre-concentration and analysis.

The recovery study was done by using laboratory tap water and polluted water samples collected from the Ede river. Recovery was done by analyzing the un-spiked and spiked water samples, and the percentage recovery was calculated as follows:

$$Recovery = \frac{C_{sp} - C_{up}}{SL} \times 100\% \quad (S5)$$

where  $C_{sp}$  is the concentration of the spiked sample (ng/L),  $C_{up}$  is the concentration of the unspiked sample (ng/L), and  $SL$  is the spike level.

Enrichment factor (EF) is defined as the ratio of volume of sample to volume of eluent:

$$EF = \frac{Vs}{Ve} \quad (S6)$$

where  $Vs$  is the volume of sample and  $Ve$  is the volume of eluent.

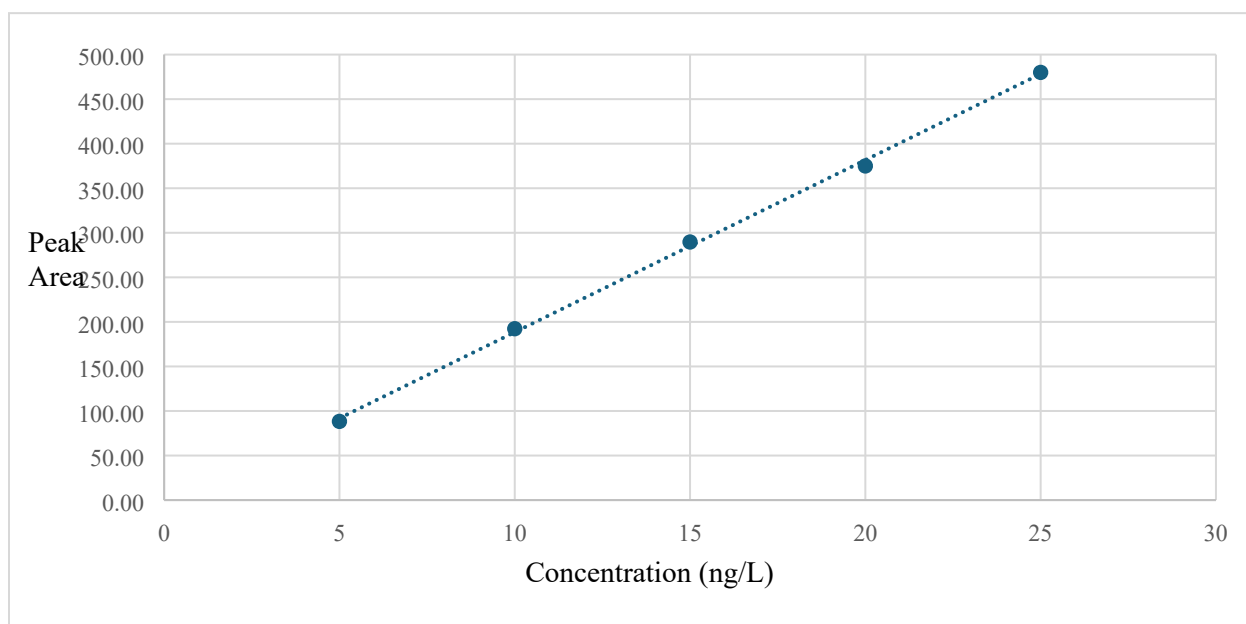

Fig S2a. TET linear range data for method validation

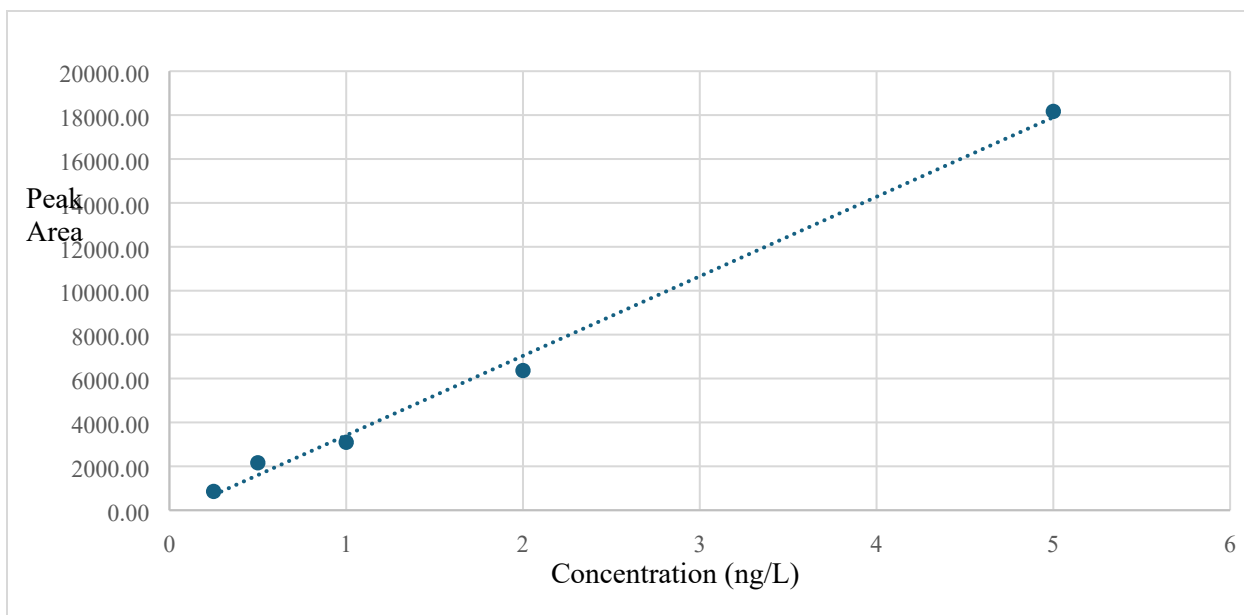

Fig S2b. AMP linear range data for method validation

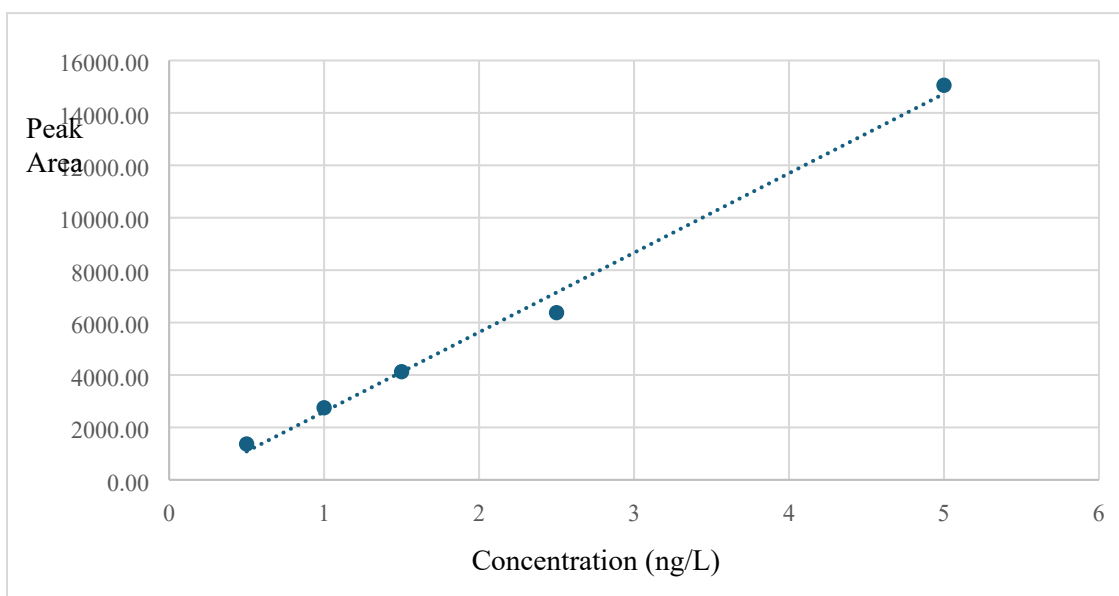

Fig S2c. SMX linear range data for method validation



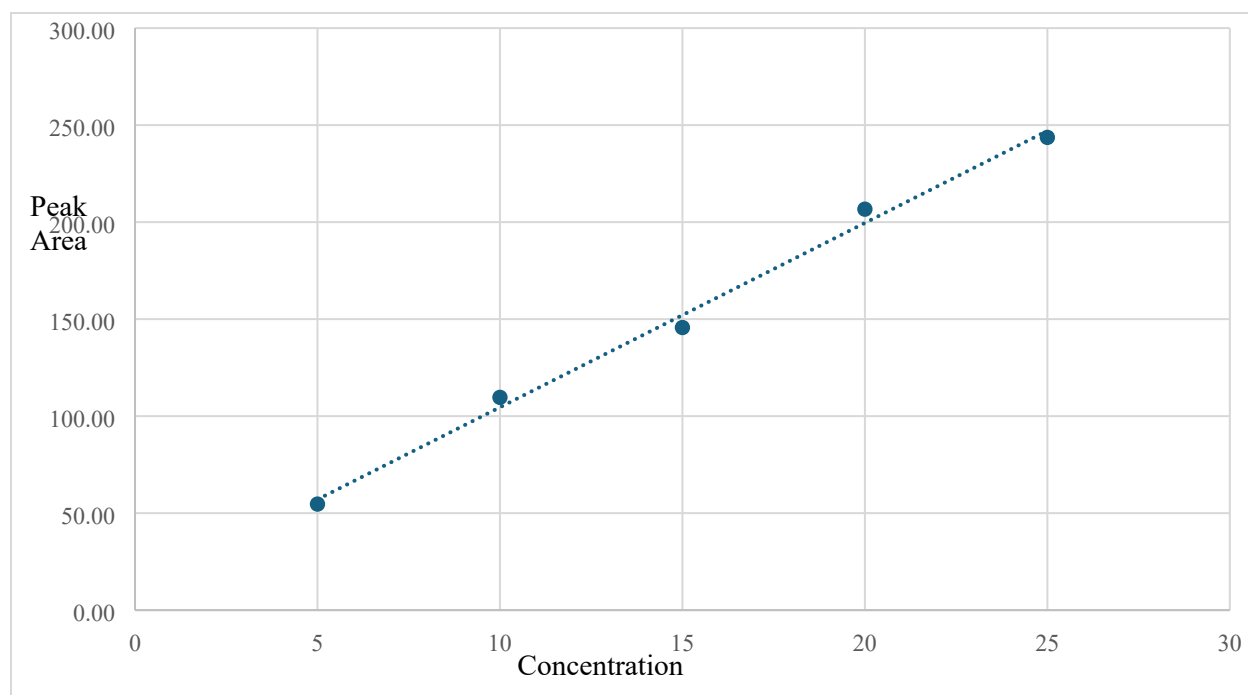

Fig S2d. PEN V linear range data for method validation

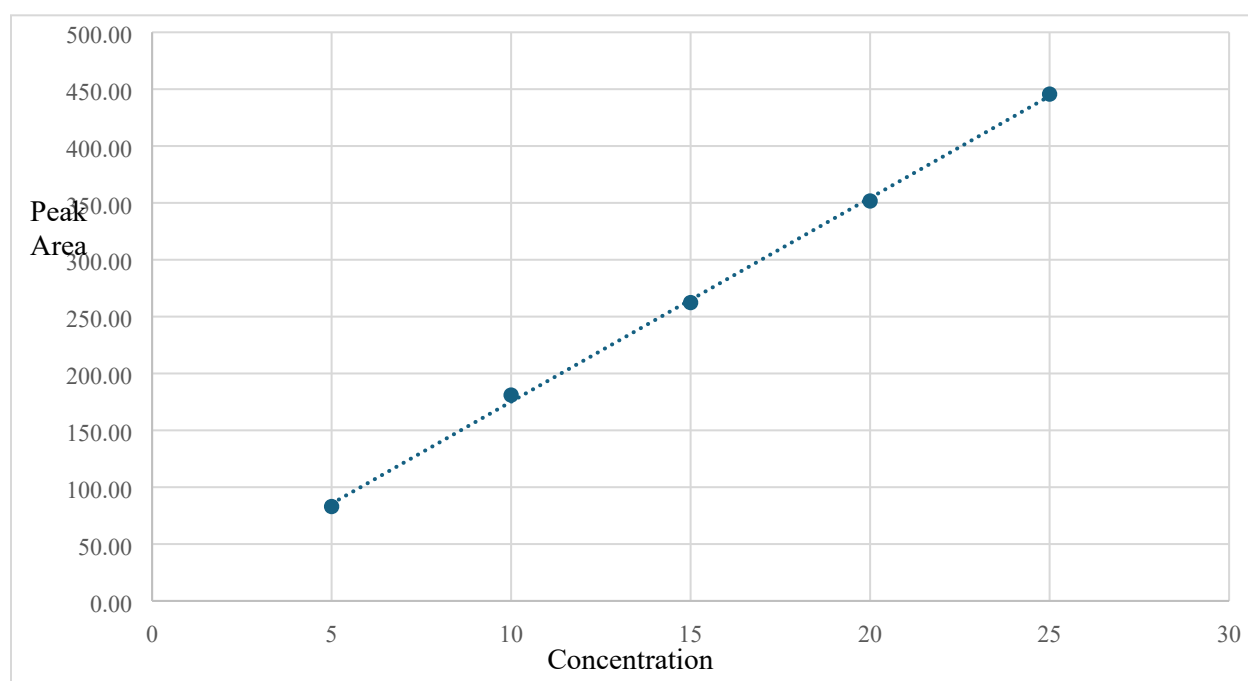

Fig S2e. PEN V linear range data for method validation

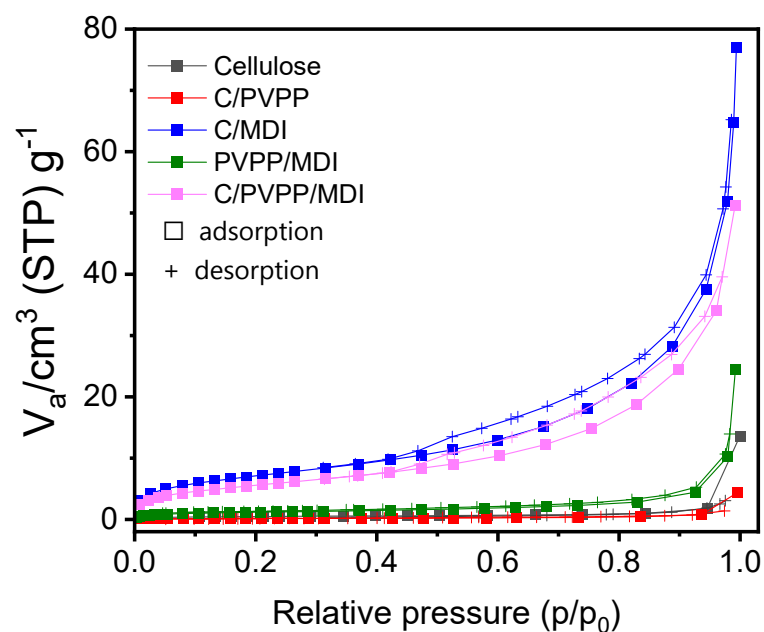

**Fig. S3.** BET plot for the prepared adsorbents

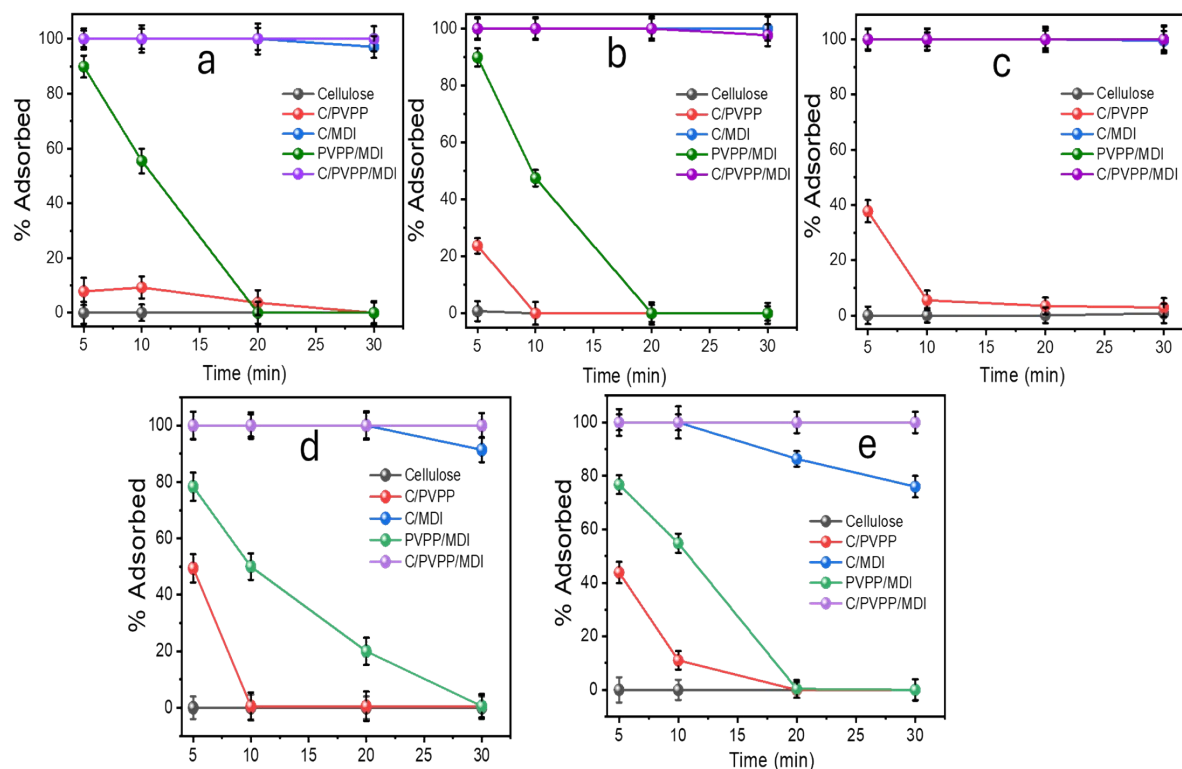

**Fig S4.** Result from the preliminary adsorption study of (a) TET (b) AMP (c) SMX (d) CAP and (e) PEN V (adsorbent dose:300 mg, contaminant concentration:5 ng/mL, sample volume: 150 mL).

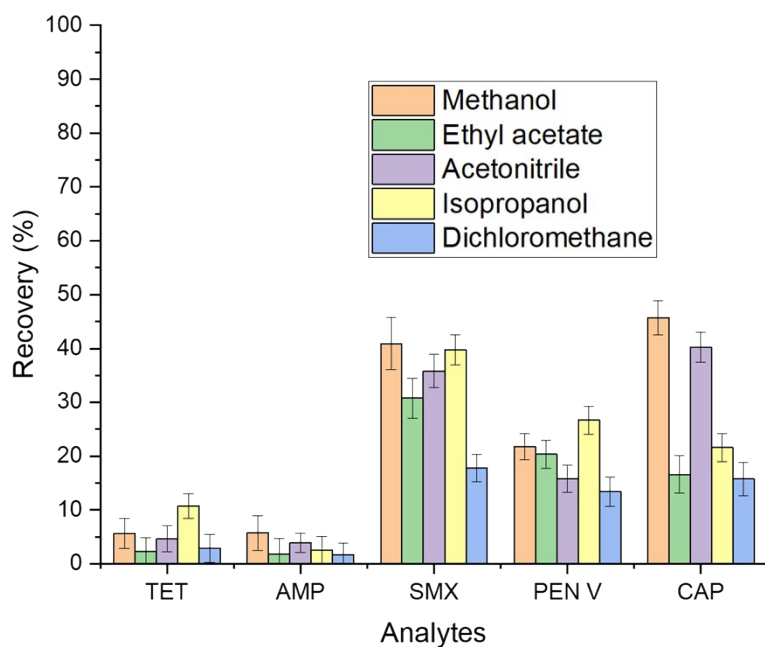

**Fig S5.** Effects of elution solvents on analytes' recovery

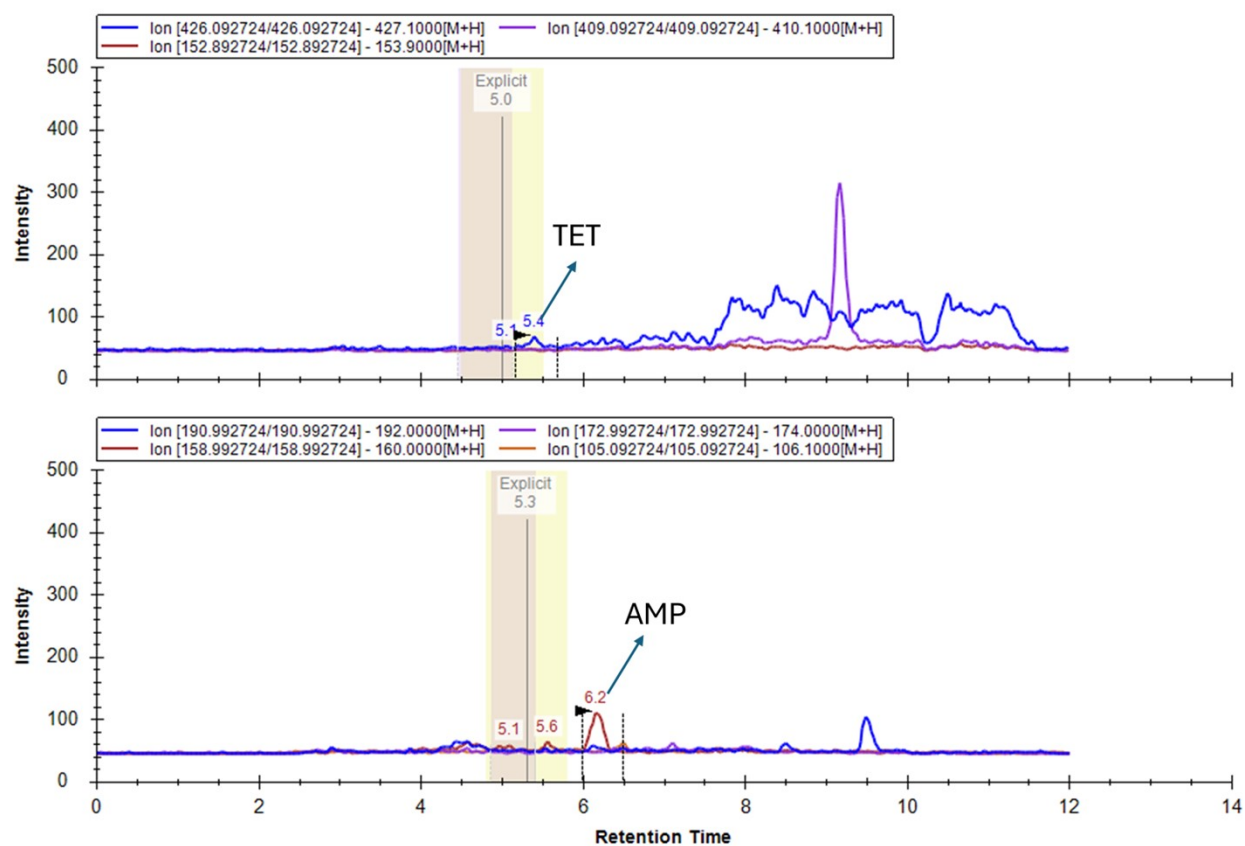

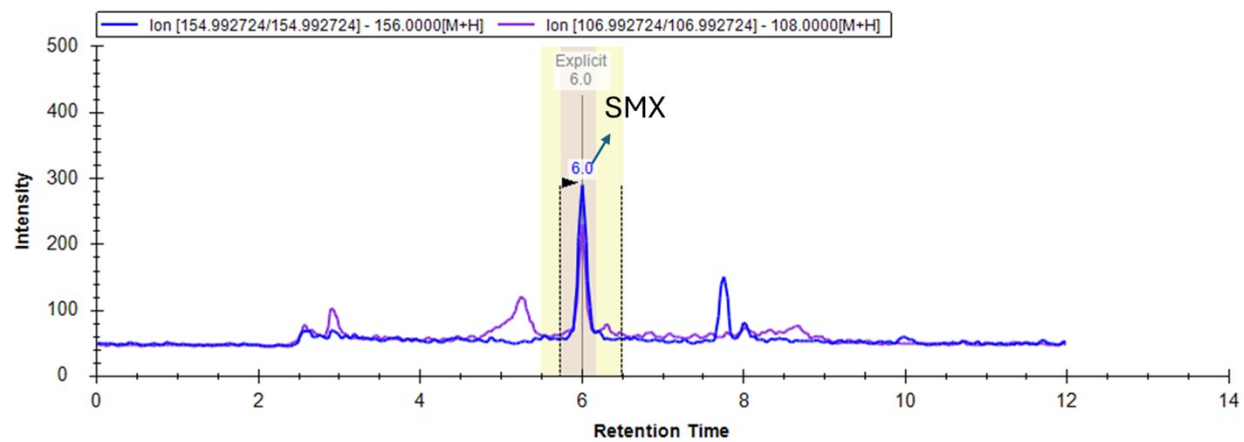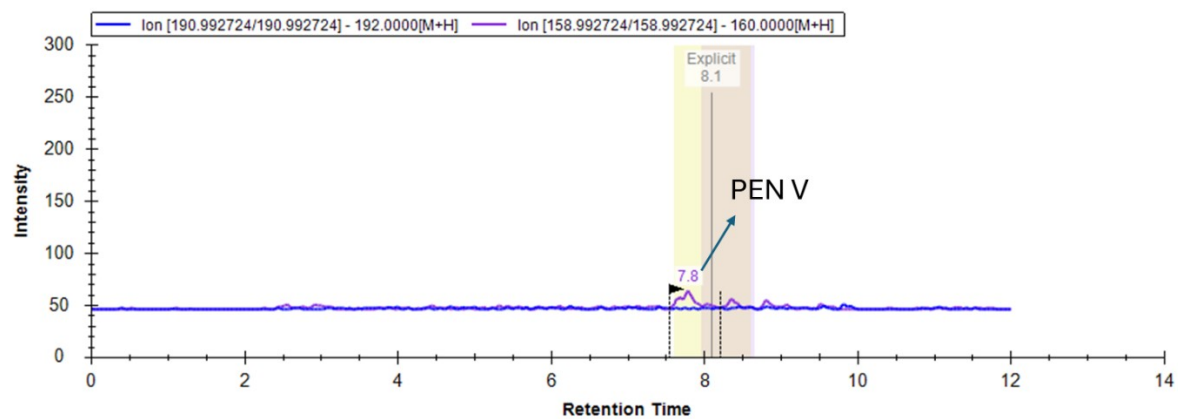

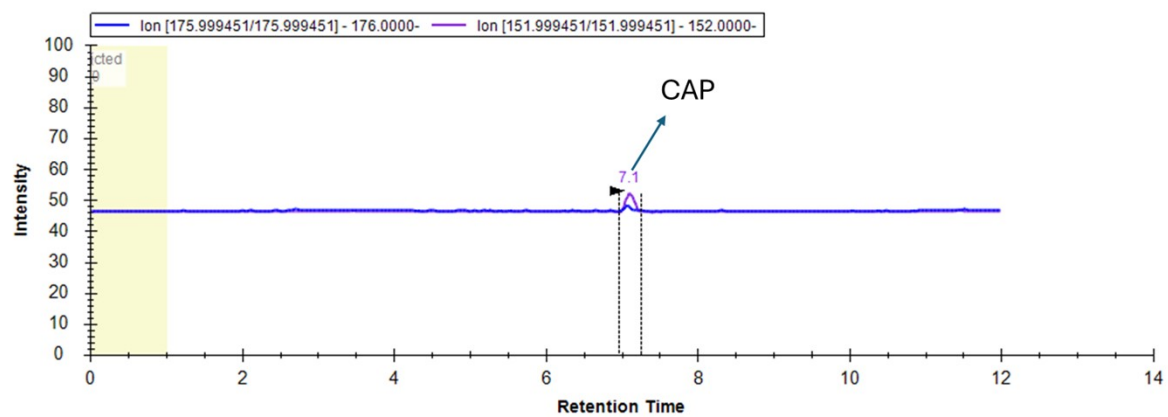

**Fig S6.** The chromatograms for the recovery of the analytes in real water sample
